# Supplementary material for: Antimicrobial and antibiofilm activity of specialized metabolites isolated from Centaurea hyalolepis
Source: PeerJ. 2024 Mar 26;12:e16973. doi: 10.7717/peerj.16973 (PMC10979744; doi:10.7717/peerj.16973)
Supplement: Supplemental Information 3 [file peerj-12-16973-s003.xlsx]

## Sheet: with test
CNICIN
	Experiment 1				Experiment 2				Experiment 3
	Staphylococcus aureus
ug/mL	Avarage	%biofilm		ug/mL	Avarage	%biofilm		ug/mL	Avarage	%biofilm		AVERAGE	SD		ug/mL	1	2	3	T-TEST
0	0.268667	100		0	0.242333	100		0	0.205333	100		100	0		0	0.268667	0.242333	0.205333
7.8125	0.259	96.402		7.8125	0.212333	87.6204		7.8125	0.194667	94.8052		92.9425	4.67776		7.8125	0.259	0.212333	0.194667	0.561954			100	100	100
15.63	0.239	88.9578		15.63	0.192667	79.5048		15.63	0.177667	86.526		84.9962	4.90866		15.63	0.239	0.192667	0.177667	0.242667			96.402	87.6204	94.8052
31.25	0.155	57.6923		31.25	0.145333	59.9725		31.25	0.168333	81.9805		66.5484	13.4131		31.25	0.155	0.145333	0.168333	0.0134281	*		88.9578	79.5048	86.526
62.5	0.122333	45.5335		62.5	0.136667	56.3961		62.5	0.159333	77.5974		59.8423	16.3074		62.5	0.122333	0.136667	0.159333	0.00955484	***		57.6923	59.9725	81.9805
125	0.103667	38.5856		125	0.114333	47.1802		125	0.156	75.974		53.9133	19.5825		125	0.103667	0.114333	0.156	0.00938772	***		45.5335	56.3961	77.5974
250	0.103333	38.4615		250	0.111667	46.0798		250	0.127667	62.1753		48.9055	12.1068		250	0.103333	0.111667	0.127667	0.00320648	***		38.5856	47.1802	75.974
500	0.095	35.3598		500	0.108	44.5667		500	0.122	59.4156		46.4474	12.1377		500	0.095	0.108	0.122	0.0028298	***		38.4615	46.0798	62.1753
																						35.3598	44.5667	59.4156
	Experiment 1				Experiment 2				Experiment 3
	MRSA
ug/mL	Avarage	%biofilm		ug/mL	Avarage	%biofilm		ug/mL	Avarage	%biofilm		AVERAGE	SD		ug/mL	1	2	3	T-TEST
0	0.217	100		0	0.236333	100		0	0.263	100		100	0		0	0.217	0.236333	0.263				100	100	100
1.95	0.207	95.3917		1.95	0.201333	85.1904		1.95	0.256	97.3384		92.6402	6.52469		1.95	0.207	0.201333	0.256	0.472702			95.3917	85.1904	97.3384
3.91	0.183333	84.4854		3.91	0.198	83.78		3.91	0.251667	95.6907		87.9854	6.68236		3.91	0.183333	0.198	0.251667	0.323365			84.4854	83.78	95.6907
7.8125	0.166333	76.6513		7.8125	0.181333	76.7278		7.8125	0.242333	92.142		81.8403	8.92153		7.8125	0.166333	0.181333	0.242333	0.191132			76.6513	76.7278	92.142
15.63	0.149667	68.9708		15.63	0.167667	70.945		15.63	0.234333	89.1001		76.3386	11.0958		15.63	0.149667	0.167667	0.234333	0.131335			68.9708	70.945	89.1001
31.25	0.136333	62.8264		31.25	0.167	70.6629		31.25	0.196333	74.6515		69.3803	6.01596		31.25	0.136333	0.167	0.196333	0.0298272	*		62.8264	70.6629	74.6515
62.5	0.131	60.3687		62.5	0.144333	61.0719		62.5	0.174333	66.2864		62.5757	3.23279		62.5	0.131	0.144333	0.174333	0.00860795	***		60.3687	61.0719	66.2864
125	0.115333	53.149		125	0.119	50.3526		125	0.165333	62.8644		55.4553	6.567		125	0.115333	0.119	0.165333	0.00722613	***		53.149	50.3526	62.8644
	Experiment 1				Experiment 2				Experiment 3
	Enterococcus faecalis
ug/mL	Avarage	%biofilm		ug/mL	Avarage	%biofilm		ug/mL	Avarage	%biofilm		AVERAGE	SD		ug/mL	1	2	3	T-TEST			100	100	100
0	0.171	100		0	0.179667	100		0	0.168333	100		100	0		0	0.171	0.179667	0.168333				98.4405	96.846	99.802
15.63	0.168333	98.4405		15.63	0.174	96.846		15.63	0.168	99.802		98.3628	1.47952		15.63	0.168333	0.174	0.168	0.503694			96.2963	90.538	96.6337
31.25	0.164667	96.2963		31.25	0.162667	90.538		31.25	0.162667	96.6337		94.4893	3.42608		31.25	0.164667	0.162667	0.162667	0.0501531	*		95.5166	87.7551	92.2772
62.5	0.163333	95.5166		62.5	0.157667	87.7551		62.5	0.155333	92.2772		91.8496	3.89836		62.5	0.163333	0.157667	0.155333	0.0269071	*		94.152	86.2709	90.8911
125	0.161	94.152		125	0.155	86.2709		125	0.153	90.8911		90.438	3.96008		125	0.161	0.155	0.153	0.0163165	*		93.1774	86.4564	83.1683
250	0.159333	93.1774		250	0.155333	86.4564		250	0.14	83.1683		87.6007	5.10171		250	0.159333	0.155333	0.14	0.0345977	*		85.9649	83.6735	80.396
500	0.147	85.9649		500	0.150333	83.6735		500	0.135333	80.396		83.3448	2.79895		500	0.147	0.150333	0.135333	0.00719521	***		84.9903	81.0761	74.8515
1000	0.145333	84.9903		1000	0.145667	81.0761		1000	0.126	74.8515		80.3059	5.11307		1000	0.145333	0.145667	0.126	0.00981898	***
	Experiment 1				Experiment 2				Experiment 3
	Acintobacter baumannii
ug/mL	Avarage	%biofilm		ug/mL	Avarage	%biofilm		ug/mL	Avarage	%biofilm		AVERAGE	SD		ug/mL	1	2	3	T-TEST			100	100	100
0	0.438333	100		0	0.416	100		0	0.42	100		100	0		0	0.438333	0.416	0.42				95.8175	85.1763	84.6032
1.95	0.42	95.8175		1.95	0.354333	85.1763		1.95	0.355333	84.6032		88.5323	6.31565		1.95	0.42	0.354333	0.355333	0.101766			77.2624	67.6282	78.3333
3.91	0.338667	77.2624		3.91	0.281333	67.6282		3.91	0.329	78.3333		74.408	5.89581		3.91	0.338667	0.281333	0.329	0.00466636	***		55.2091	57.6923	66.3492
7.8125	0.242	55.2091		7.8125	0.24	57.6923		7.8125	0.278667	66.3492		59.7502	5.84821		7.8125	0.242	0.24	0.278667	0.000280842	***		41.597	39.7436	55.3968
15.63	0.182333	41.597		15.63	0.165333	39.7436		15.63	0.232667	55.3968		45.5791	8.55273		15.63	0.182333	0.165333	0.232667	0.00041187	***		39.7719	37.2596	47.1429
31.25	0.174333	39.7719		31.25	0.155	37.2596		31.25	0.198	47.1429		41.3914	5.13682		31.25	0.174333	0.155	0.198	6.22525e-05	****		30.9506	33.8942	33.9683
62.5	0.135667	30.9506		62.5	0.141	33.8942		62.5	0.142667	33.9683		32.9377	1.72129		62.5	0.135667	0.141	0.142667	2.42319e-06	****		29.8859	30.9295	29.9206
125	0.131	29.8859		125	0.128667	30.9295		125	0.125667	29.9206		30.2454	0.592733		125	0.131	0.128667	0.125667	1.91121e-06	****
	Experiment 1				Experiment 2				Experiment 3
	Salmonella typhiumurim
ug/mL	Avarage	%biofilm		ug/mL	Avarage	%biofilm		ug/mL	Avarage	%biofilm		AVERAGE	SD		ug/mL	1	2	3	T-TEST
0	0.277	100		0	0.274333	100		0	0.289333	100		100	0		0	0.277	0.274333	0.289333				100	100	100
1.95	0.229	82.6715		1.95	0.233667	85.1762		1.95	0.26	89.8618		85.9031	3.64984		1.95	0.229	0.233667	0.26	0.0212721	*		82.6715	85.1762	89.8618
3.91	0.219	79.0614		3.91	0.222	80.9235		3.91	0.249	86.0599		82.0149	3.62468		3.91	0.219	0.222	0.249	0.00904888	***		79.0614	80.9235	86.0599
7.8125	0.190667	68.8327		7.8125	0.209333	76.3062		7.8125	0.210333	72.6959		72.6116	3.73745		7.8125	0.190667	0.209333	0.210333	0.000624416	****		68.8327	76.3062	72.6959
15.63	0.16	57.7617		15.63	0.161333	58.8092		15.63	0.173333	59.9078		58.8263	1.07315		15.63	0.16	0.161333	0.173333	5.14127e-05	****		57.7617	58.8092	59.9078
31.25	0.148	53.4296		31.25	0.1429	52.0899		31.25	0.145667	50.3456		51.955	1.54641		31.25	0.148	0.1429	0.145667	9.99431e-06	****		53.4296	52.0899	50.3456
62.5	0.121667	43.923		62.5	0.111333	40.5832		62.5	0.133	45.9677		43.4913	2.71809		62.5	0.121667	0.111333	0.133	3.44778e-05	****		43.923	40.5832	45.9677
125	0.1	36.1011		125	0.101	36.8165		125	0.123667	42.7419		38.5532	3.64516		125	0.1	0.101	0.123667	4.42361e-05	****		36.1011	36.8165	42.7419
	Experiment 1				Experiment 2				Experiment 3
	Escherichia coli
ug/mL	Avarage	%biofilm		ug/mL	Avarage	%biofilm		ug/mL	Avarage	%biofilm		AVERAGE	SD		ug/mL	1	2	3	T-TEST
0	0.179333	100		0	0.187333	100		0	0.179667	100		100	0		0	0.179333	0.187333	0.179667
1.95	0.176667	98.513		1.95	0.173667	92.7046		1.95	0.164333	91.4657		94.2278	3.76247		1.95	0.176667	0.173667	0.164333	0.0807203	*		100	100	100
3.91	0.165	92.0074		3.91	0.172333	91.9929		3.91	0.164	91.2801		91.7602	0.415762		3.91	0.165	0.172333	0.164	0.0154964	**		98.513	92.7046	91.4657
7.8125	0.155	86.4312		7.8125	0.168667	90.0356		7.8125	0.164	91.2801		89.249	2.51835		7.8125	0.155	0.168667	0.164	0.015033	**		92.0074	91.9929	91.2801
15.63	0.146	81.4126		15.63	0.166	88.6121		15.63	0.156333	87.013		85.6792	3.7805		15.63	0.146	0.166	0.156333	0.0148275	**		86.4312	90.0356	91.2801
31.25	0.124667	69.5167		31.25	0.141333	75.4448		31.25	0.141	78.4787		74.4801	4.5582		31.25	0.124667	0.141333	0.141	0.00158722	***		81.4126	88.6121	87.013
62.5	0.108667	60.5948		62.5	0.104	55.516		62.5	0.103	57.3284		57.8131	2.57385		62.5	0.108667	0.104	0.103	1.6561e-05	****		69.5167	75.4448	78.4787
125	0.106	59.1078		125	0.0916667	48.9324		125	0.0986667	54.9165		54.3189	5.11397		125	0.106	0.0916667	0.0986667	6.97573e-05	****		60.5948	55.516	57.3284
																						59.1078	48.9324	54.9165
