# Supplementary material for: Antimicrobial and antibiofilm activity of specialized metabolites isolated from Centaurea hyalolepis
Source: PeerJ. 2024 Mar 26;12:e16973. doi: 10.7717/peerj.16973 (PMC10979744; doi:10.7717/peerj.16973)
Supplement: Supplemental Information 4 [file peerj-12-16973-s004.xlsx]

## Sheet: Sheet1
	bardford standrad
μg/mL	1	2	3	4
0	0.129	0.115	0.126	0.131
0.195	0.142	0.123	0.146	0.135				Campioni	A 595 nm		media	Δ
0.39	0.175	0.148	0.167	0.146					I	II
0.78	0.158	0.132	0.169	0.162				Bianco	0.154	0.15	0.152
1.5625	0.141	0.148	0.187	0.185				0	0	0	0	0
3.125	0.193	0.189	0.191	0.197				0.0078	0.176	0.177	0.1765	0.0455
6.25	0.217	0.201	0.194	0.217				0.0156	0.195	0.2	0.1975	0.0665
12.5	0.228	0.233	0.242	0.257				0.0325	0.26	0.277	0.2685	0.1375
25	0.376	0.315	0.376	0.307				0.0625	0.348	0.321	0.3345	0.2035
50	0.375	0.35	0.379	0.361				0.125	0.368	0.379	0.3735	0.2425
100	0.399	0.383	0.324	0.39				0.25	0.456	0.489	0.4725	0.3415
200	0.4	0.441	0.456	0.411				0.5	0.567	0.612	0.5895	0.4585
E.fecalis										E.coli
mg/mL	PELLET	PELLET	PELLET corrected	PELLET corrected	[PROTEINS]	[PROTEINS]	AV	SD		mg/mL	PELLET	PELLET	PELLET corrected	PELLET corrected	[PROTEINS]	[PROTEINS]	AV	SD
0	0.51	0.531333	0.379	0.400333	0.389077	0.410978	0.400027	0.015486		0	0.375	0.386667	0.244	0.255667	0.250488	0.262464	0.256476	0.00846892
0.25	0.225	0.249333	0.094	0.118333	0.0964993	0.12148	0.108989	0.0176638		0.031	0.227	0.257	0.096	0.126	0.0985525	0.12935	0.113951	0.0217772
0.5	0.156667	0.169333	0.0256667	0.0383333	0.0263491	0.0393526	0.0328508	0.00919483		0.062	0.236333	0.249333	0.105333	0.118333	0.108134	0.12148	0.114807	0.0094368
1	0.16	0.166667	0.029	0.0356667	0.0297711	0.036615	0.033193	0.00483939		0.125	0.168	0.157	0.037	0.026	0.0379838	0.0266913	0.0323375	0.00798499
S.aureus
mg/mL	PELLET	PELLET	PELLET corrected	PELLET corrected	[PROTEINS]	[PROTEINS]	AV	SD		S. typhimorium
0	0.38	0.350333	0.249	0.219333	0.255621	0.225165	0.240393	0.0215353		mg/mL	PELLET	PELLET	PELLET corrected	PELLET corrected	[PROTEINS]	[PROTEINS]	AV	SD
0.125	0.252333	0.241667	0.121333	0.110667	0.124559	0.113609	0.119084	0.00774302		0	0.326	0.346333	0.195	0.215333	0.200185	0.221059	0.210622	0.0147601
0.25	0.171333	0.176667	0.0403333	0.0456667	0.0414057	0.0468809	0.0441433	0.00387151		0.031	0.245667	0.247	0.114667	0.116	0.117715	0.119084	0.1184	0.000967877
0.5	0.151667	0.154	0.0206667	0.023	0.0212162	0.0236115	0.0224139	0.00169378		0.062	0.174667	0.162333	0.0436667	0.0313333	0.0448277	0.0321664	0.0384971	0.00895286
										0.125	0.166667	0.158	0.0356667	0.027	0.036615	0.0277179	0.0321664	0.0062912
MRSA
mg/mL	PELLET	PELLET	PELLET corrected	PELLET corrected	[PROTEINS]	[PROTEINS]	AV	SD		A.baumannii
0	0.434667	0.448	0.303667	0.317	0.311741	0.325429	0.318585	0.00967877		mg/mL	PELLET	PELLET	PELLET corrected	PELLET corrected	[PROTEINS]	[PROTEINS]	AV	SD
0.031	0.374	0.349667	0.243	0.218667	0.249461	0.224481	0.236971	0.0176638		0	0.546667	0.530333	0.415667	0.399333	0.426719	0.409951	0.418335	0.0118565
0.062	0.267333	0.218	0.136333	0.087	0.139958	0.0893132	0.114636	0.0358115		0.031	0.370333	0.349	0.239333	0.218	0.245697	0.223796	0.234747	0.015486
0.125	0.224667	0.229667	0.0936667	0.0986667	0.0961571	0.10129	0.0987236	0.00362954		0.062	0.282333	0.314333	0.151333	0.183333	0.155357	0.188208	0.171783	0.023229
										0.125	0.170667	0.178	0.0396667	0.047	0.0407213	0.0482497	0.0444855	0.00532332

## Sheet: Sheet2
	Diboas standrad
mg/mL	1	2	3	4	5	6
0	0.081	0.078	0.073	0.081	0.081	0.082
0.004	0.098	0.091	0.097	0.096	0.078	0.077
0.0097	0.094	0.118	0.12	0.116	0.093	0.083
0.019	0.102	0.115	0.129	0.121	0.124	0.079
0.039	0.186	0.198	0.185	0.198	0.08	0.086
0.078	0.129	0.13	0.122	0.126	0.122	0.123
0.156	0.137	0.119	0.166	0.142	0.196	0.17
0.312	0.586	0.561	0.585	0.562	0.59	0.586
0.625	0.834	0.808	0.859	0.834	0.814	0.823
1.25	2.78	2.737	2.975	2.073	2.928	2.495
2.5	2.533	2.514	2.171	2.162	0.138	1.208
5	2.475	2.511	2.461	2.9	3.151	3.162
Campioni	A 482 nm							media	Δ
	I	II	III	IV	V	VI
Bianco	0.081	0.078	0.073	0.081	0.081	0.082		0.0793333
0	0	0	0	0	0	0		0	0
0.004	0.098	0.091	0.097	0.096	0.078	0.077		0.0895	0.0101667
0.0097	0.094	0.118	0.12	0.116	0.093	0.083		0.104	0.0246667
0.019	0.102	0.115	0.129	0.121	0.124	0.079		0.111667	0.0323333
0.039	0.186	0.198	0.185	0.198	0.08	0.086		0.1555	0.0761667
0.078	0.129	0.13	0.122	0.126	0.122	0.123		0.125333	0.046
0.156	0.137	0.119	0.166	0.142	0.196	0.17		0.155	0.0756667
0.312	0.586	0.561	0.585	0.562	0.59	0.586		0.578333	0.499
0.625	0.834	0.808	0.859	0.834	0.814	0.823		0.828667	0.749333
E.fecalis										E.coli
mg/mL	PELLET	PELLET	PELLET corrected	PELLET corrected	SUGARS	SUGARS	AV	SD		mg/mL	PELLET	PELLET	PELLET corrected	PELLET corrected	SUGARS	SUGARS	AV	SD
0	0.186333	0.190333	0.107	0.111	0.107722	0.107998	0.10786	0.000195111		0	0.242333	0.242667	0.163	0.163333	0.164099	0.164435	0.164267	0.000237292		salmon	salmon	salmon	A BAU	A BAU	A BAU
0.25	0.164	0.167667	0.0846667	0.0883333	0.0852378	0.0859441	0.0855909	0.000499449		0.031	0.19	0.189	0.110667	0.109667	0.111413	0.110406	0.11091	0.000711876		0.113	0.122	0.152	0.108	0.115	0.164	0
0.5	0.122	0.122	0.0426667	0.0426667	0.0429545	0.0415126	0.0422335	0.00101954		0.062	0.125667	0.121	0.0463333	0.0416667	0.0466459	0.0419477	0.0442968	0.00332209		0.101	0.201	0.103	0.142	0.076	0.112
1	0.102667	0.095	0.0233333	0.0156667	0.0234907	0.0152429	0.0193668	0.00583208		0.125	0.107333	0.107167	0.028	0.0278333	0.0281889	0.0280211	0.028105	0.000118646		0.098	0.207	0.174	0.191	0.071	0.106
																				0.101	0.131	0.101	0.158	0.063	0.099
S.aureus																				0.118	0.133	0.103	0.119	0.058	0.103	125 ug
mg/mL	PELLET	PELLET	PELLET corrected	PELLET corrected	SUGARS	SUGARS	AV	SD		S. typhimorium
0	0.219667	0.263333	0.140333	0.184	0.14128	0.185241	0.163261	0.0310853		mg/mL	PELLET	PELLET	PELLET corrected	PELLET corrected	SUGARS	SUGARS	AV	SD		E FEC			S AUREOUS			MRSA			ECOLI
0.125	0.119967	0.117833	0.0406333	0.0385	0.0409074	0.0387597	0.0398336	0.00151867		0	0.281667	0.287	0.202333	0.207667	0.203698	0.209067	0.206383	0.00379667		0.115	0.119	0.096	0.099	0.119	0.12	0.109	0.121	0.12	0.109	0.137	0.094
0.25	0.088	0.0886667	0.00866667	0.00933333	0.00872513	0.00939629	0.00906071	0.000474584		0.031	0.169	0.153667	0.0896667	0.0743333	0.0902715	0.0748347	0.0825531	0.0109154		0.094	0.104	0.096	0.126	0.105	0.09	0.102	0.101	0.111	0.102	0.1	0.09
0.5	0.0873333	0.0853333	0.008	0.006	0.00805396	0.00604047	0.00704722	0.00142375		0.062	0.146333	0.136	0.067	0.0566667	0.0674519	0.0570489	0.0622504	0.00735606		0.093	0.091	0.106	0.087	0.11	0.081	0.082	0.093	0.09	0.078	0.092	0.103
										0.125	0.0886667	0.0993333	0.00933333	0.02	0.00939629	0.0201349	0.0147656	0.00759335		0.096	0.158	0.097	0.113	0.109	0.103	0.147	0.136	0.132	0.113	0.16	0.11
MRSA
mg/mL	PELLET	PELLET	PELLET corrected	PELLET corrected	SUGARS	SUGARS	AV	SD		A.baumannii										duboas	5.4.2023
0	0.217	0.213333	0.137667	0.134	0.138595	0.134904	0.13675	0.00261021		mg/mL	PELLET	PELLET	PELLET corrected	PELLET corrected	SUGARS	SUGARS	AV	SD		0.23	0.186	0.143	0.115	0.116	0.128	0.266	0.196	0.189	0.152	0.132	0.243
0.031	0.190333	0.194	0.111	0.114667	0.111749	0.11544	0.113594	0.00261021		0	0.354333	0.314667	0.275	0.235333	0.276855	0.236921	0.256888	0.0282378		0.122	0.092	0.088	0.111	0.159	0.09	0.092	0.089	0.1	0.112	0.084	0.126
0.062	0.135667	0.125333	0.0563333	0.046	0.0567133	0.0463103	0.0515118	0.00735606		0.031	0.129	0.125333	0.0496667	0.046	0.0500017	0.0463103	0.048156	0.00261021		0.143	0.098	0.091	0.082	0.096	0.086	0.087	0.094	0.083	0.116	0.103	0.098
0.125	0.104	0.106	0.0246667	0.0266667	0.024833	0.0268465	0.0258398	0.00142375		0.062	0.106333	0.104333	0.027	0.025	0.0271821	0.0251686	0.0261754	0.00142375		0.141	0.107	0.111	0.088	0.099	0.125	0.106	0.098	0.108	0.138	0.117	0.105
										0.125	0.0836667	0.0843333	0.00433333	0.005	0.00436256	0.00503373	0.00469814	0.000474584		0.668	0.136	0.141	0.188	0.114	0.242	0.219	0.161	0.808	0.737	1.514	0.511
																				0.174	0.178	0.1	0.09	0.093	0.122	0.13	0.098	0.115	0.088	0.091	0.078
																				0.162	0.204	0.133	0.102	0.143	0.108	0.137	0.186	0.434	0.78	0.533	2.475
																				0.159	0.305	0.202	0.169	0.129	0.124	0.129	0.106	0.102	0.094	0.098	0.081
	E. fecalis			ava				ava												duboas	6.4.2023
	0.23	0.186	0.143	0.186333	0.197	0.181	0.193	0.190333												0.197	0.101	0.143	0.101	0.118	0.081	0.114	0.11	0.205	0.098	0.088	0.352
80	0.162	0.162	0.168	0.164	0.169	0.17	0.164	0.167667												0.109	0.09	0.095	0.076	0.094	0.081	0.097	0.096	0.089	0.097	0.076	0.085
	0.123	0.119	0.124	0.122	0.123	0.125	0.118	0.122												0.103	0.145	0.138	0.147	0.175	0.194	0.154	0.258	0.134	0.109	0.114	0.362
	0.1	0.107	0.101	0.102667	0.095	0.092	0.098	0.095												0.095	0.142	0.18	0.149	0.166	0.448	0.211	0.253	0.124	0.107	0.098	0.312
																				0.284	0.23	0.294	0.174	0.167	0.322	0.542	0.892	1.034	2.073	3.162	2.9
	S.aureus			ava				ava												0.163	0.113	0.155	0.129	0.092	0.238	0.226	0.198	0.121	0.116	0.096	0.081
	0.215	0.216	0.228	0.219667	0.231	0.318	0.241	0.263333												0.119	0.104	0.135	0.258	0.178	0.154	0.466	0.985	1.598	2.975	3.171	3.461
50	0.111	0.129	0.1199	0.119967	0.116	0.1194	0.1181	0.117833												0.133	0.082	0.156	0.125	0.073	0.193	0.162	0.185	0.159	0.12	0.097	0.073
	0.082	0.096	0.086	0.088	0.087	0.085	0.094	0.0886667
	0.078	0.079	0.075	0.0773333	0.09	0.086	0.08	0.0853333
	MRSA			ava				ava
	0.266	0.196	0.189	0.217	0.214	0.211	0.215	0.213333
60	0.192	0.189	0.19	0.190333	0.197	0.196	0.189	0.194
	0.137	0.14	0.13	0.135667	0.124	0.118	0.134	0.125333
	0.106	0.098	0.108	0.104	0.111	0.103	0.104	0.106
	E.COLI			ava				ava
	0.252	0.232	0.243	0.242333	0.238	0.238	0.252	0.242667
	0.198	0.187	0.185	0.19	0.187	0.188	0.192	0.189
60	0.116	0.133	0.128	0.125667	0.119	0.124	0.12	0.121
	0.102	0.104	0.116	0.107333	0.107	0.106	0.1085	0.107167
	S.typhimorium			ava				ava
	0.268	0.286	0.291	0.281667	0.284	0.283	0.294	0.287
	0.174	0.168	0.165	0.169	0.163	0.143	0.155	0.153667
40	0.162	0.144	0.133	0.146333	0.129	0.144	0.135	0.136
	0.059	0.105	0.102	0.0886667	0.103	0.089	0.106	0.0993333
	A.baumannii			ava				ava
	0.374	0.367	0.322	0.354333	0.388	0.314	0.242	0.314667
35	0.129	0.12	0.138	0.129	0.131	0.123	0.122	0.125333
	0.108	0.107	0.104	0.106333	0.102	0.103	0.108	0.104333
	0.085	0.073	0.093	0.0836667	0.069	0.09	0.094	0.0843333
