# Supplementary material for: Antimicrobial and antibiofilm activity of specialized metabolites isolated from Centaurea hyalolepis
Source: PeerJ. 2024 Mar 26;12:e16973. doi: 10.7717/peerj.16973 (PMC10979744; doi:10.7717/peerj.16973)
Supplement: Supplemental Information 5 [file peerj-12-16973-s005.xlsx]

## Sheet: CH2L2
Staphylococcus aureus ATCC 29213
Escherichia coli ATCC 25922
Salmonella typhimurium ATCC 14028
Acinetobacter baumannii ATCC 17878
Enterococcus faecalis ATCC 29212
Methicillin-resistant Staphylococcus aureus (MRSA)(WKZ-1)
					not Treated
					CTRL/ prev											CTRL
																bacteria	stdev
	Staphylococcus aureus				2665900000000	27000000000	510000000000	8200000000	1580000000	8000000000	500000000	660000000		79420000000		1372660000000	1.82892e+12
	MRSA				2.33787e+12	650000000	440000000	3000000000	1300000000	70000000000	50000000000	1400000000	18000000000	18098750000		1.17798e+12	1.64032e+12
	Enterococcus faecalis				2.48567e+11	50000000000	730000000000	760000000	7800000000					197140000000		2.22853e+11	3.63641e+10
	Acinetobacter baumannii				4.62333e+11	95000000000	60000000000	1050000000000	1420000000000	3100000000	1640000000	10000000000	6400000000	330767500000		3.9655e+11	9.30311e+10
	Escherichia coli				2599000000000	1560000000	15600000000	25000000000	150000000000	1120000000	12700000000	17000000000	190000000000	51622500000		1325311250000	1.80127e+12
	Salmonella typhimurium				2106450000000	2000000000	2220000000	15900000000	15600000000	129000000000	110000000000	680000000000	470000000000	178090000000		1142270000000	1.36356e+12
	Dichloromethane Fraction of C.hyalolepis
	MRSA											Staphylococcus aureus											Enterococcus faecalis
	mg/mL						STDEV	LOG STDEV	MIC			mg/mL						STDEV	LOG STDEV	MIC			mg/mL						STDEV	LOG STDEV	MIC
	2	0	0	0		0	0	#NUM!		1		2	0	0	0		0	0	0	0	100		2	7600	590000	1200000		599200	596253	5.77543	0.000268876	100
	1	42400	54000	12000		36133.3	21689.9	4.33626	3.06739e-06	1		1	1120	2300	1760		1726.67	590.706	0	1.2579e-07	100		1	32000000	15400000	148000000		6.51333e+07	7.2243e+07	7.8588	0.029227	97
	0.5	17000000	125000000	156000000	60000000	89500000	6.27402e+07	7.79755	0.00759773	1		0.5	120000000	280000000	37000000	100000000	134250000	1.23517e+08	8.09173	0.00978028	100		0.5
	0.25	150000000	140000000	2800000000	760000000	962500000	1.25885e+09		0.0817075	0.92		0.25	62000000	83000000	110000000	170000000	106250000			0.00774045	100		0.25
	0.125											0.125	238000000	1080000000	260000000	750000000	582000000			0.0423994	0.96		0.125
	Acinetobacter baumannii											Escherichia coli											Salmonella typhimurium
	mg/mL						STDEV	LOG STDEV	MIC			mg/mL						STDEV	LOG STDEV	MIC			mg/mL						STDEV	LOG STDEV	MIC
	2	0	0	0		0	0	0	0	1		2	150	100	170		140	36.0555	1.55697	1.05636e-08	100		2	0	0	0	0	0	0	#NUM!	0	1
	1	0	0	30		10	17.3205	1.23856	2.52175e-09	1		1	45000000	35000000	16400000		3.21333e+07	1.45139e+07	7.16178	0.00242459	100		1	620	540	670		610	65.5744	1.81673	5.34024e-08	1
	0.5	120000	190000			155000			3.90871e-05	1		0.5	162000000	183000000	1740000000		695000000			0.0524405	95		0.5	154000000	67200000	2860000000		1.02707e+09	1.58796e+09	9.20084	0.0899145	0.92
	0.25	11500000	1490000	1760000	11900000	4.91667e+06			0.00123986	1		0.25											0.25	716000000	2050000000	2880000000		1882000000			0.16476	0.84
	0.125	268000000	345000000	780000000	990000000	4.64333e+08			0.0350358	0.96		0.125											0.125

## Sheet: Hexane
Staphylococcus aureus ATCC 29213
Escherichia coli ATCC 25922
Salmonella typhimurium ATCC 14028
Acinetobacter baumannii ATCC 17878
Enterococcus faecalis ATCC 29212
Methicillin-resistant Staphylococcus aureus (MRSA)(WKZ-1)
					not Treated
					CTRL/ prev											CTRL
																bacteria	stdev
	Staphylococcus aureus				2665900000000	27000000000	510000000000	8200000000	1580000000	8000000000	500000000	660000000		79420000000		1372660000000	1.82892e+12
	MRSA				2.33787e+12	650000000	440000000	3000000000	1300000000	70000000000	50000000000	1400000000	18000000000	18098750000		1.17798e+12	1.64032e+12
	Enterococcus faecalis				2.48567e+11	50000000000	730000000000	760000000	7800000000					197140000000		2.22853e+11	3.63641e+10
	Acinetobacter baumannii				4.62333e+11	95000000000	60000000000	1050000000000	1420000000000	3100000000	1640000000	10000000000	6400000000	330767500000		3.9655e+11	9.30311e+10
	Escherichia coli				2599000000000	1560000000	15600000000	25000000000	150000000000	1120000000	12700000000	17000000000	190000000000	51622500000		1325311250000	1.80127e+12
	Salmonella typhimurium				2106450000000	2000000000	2220000000	15900000000	15600000000	129000000000	110000000000	680000000000	470000000000	178090000000		1142270000000	1.36356e+12
	Hexane Fraction of C.hyalolepis
	MRSA											Staphylococcus aureus											Enterococcus faecalis
	mg/mL						STDEV	LOG STDEV	MIC			mg/mL						STDEV	LOG STDEV	MIC			mg/mL						STDEV	LOG STDEV	MIC
	2	0	350	0		116.667	202.073	2.30551	9.90394e-09	1		2	0	0	0		0	0	0	0	100		2	5100	7000	4000		5366.67	1517.67	3.18118	2.40816e-06	100
	1	0	540	0		180	311.769	2.49383	1.52804e-08	1		1	0	0	0		0	0	0	0	100		1	250000000	42800000	72000000		121600000	1.12152e+08	8.04981	0.054565	95
	0.5	352000000	240000000	670000000		4.20667e+08	2.23072e+08	8.34845	0.0357108	0.96		0.5	334000000	232000000	1080000000		5.48667e+08	4.62966e+08	8.66555	0.0399711	0.96		0.5
	0.25											0.25											0.25
	0.125											0.125											0.125
	Acinetobacter baumannii											Escherichia coli											Salmonella typhimurium
	mg/mL						STDEV	LOG STDEV	MIC			mg/mL						STDEV	LOG STDEV	MIC			mg/mL						STDEV	LOG STDEV	MIC
	2	0	0	0		0	0	0	0	1		2	0	0	470		156.667	271.355	2.43354	1.18211e-08	100		2	0	0	50		16.6667	28.8675	1.46041	1.45908e-09	1
	1	188000000	106000000	270000000		188000000	82000000	7.91381	0.0474089	0.95		1	424000000	550000000	178000000		384000000	1.89198e+08	8.27692	0.0289743	97		1	0	0	120		40	69.282	1.84062	3.5018e-09	1
	0.5											0.5											0.5	448000000	224000000	660000000		444000000	2.18028e+08	8.33851	0.03887	0.96
	0.25											0.25											0.25
	0.125											0.125											0.125

## Sheet: ETOAC
Staphylococcus aureus ATCC 29213
Escherichia coli ATCC 25922
Salmonella typhimurium ATCC 14028
Acinetobacter baumannii ATCC 17878
Enterococcus faecalis ATCC 29212
Methicillin-resistant Staphylococcus aureus (MRSA)(WKZ-1)
																	AVARAGE	STDEV	log stdev
	Staphylococcus aureus			1372660000000	2665900000000									#DIV/0!	1372660000000	2665900000000
	MRSA			1.17798e+12	2.33787e+12	4360000000	28000000000	240000000000	820000000000	2160000000	44000000000	180000000000	1160000000000	309815000000	1.17798e+12	2.33787e+12	309815000000	1.01752e+12	12.0075
	Enterococcus faecalis			2.22853e+11	2.48567e+11	280000000	10000000000	100000000000	100000000000	400000000	1200000000	40000000000	600000000000	106485000000	2.22853e+11	2.48567e+11	192635000000	7.57077e+10	10.8791
	Acinetobacter baumannii			3.9655e+11	4.62333e+11	1800000000	10400000000	168000000000	1800000000000	1060000000	3400000000	22000000000	140000000000	268332500000	3.9655e+11	4.62333e+11	375738750000	9.86607e+10	10.9941
	Escherichia coli			1325311250000	2599000000000									#DIV/0!	1325311250000	2599000000000		#DIV/0!	#DIV/0!
	Salmonella typhimurium			1142270000000	2106450000000	2400000000	4300000000	36000000000	45000000000	272000000000	194000000000	2300000000000	3700000000000	819212500000	1142270000000	2106450000000	1355977500000	6.697e+11	11.8259
	Ethylacetate (2) Fraction of C.hyalolepis																			1.51943e+12
	MRSA								1.27522e+12			Staphylococcus aureus											Enterococcus faecalis								192635000000
	mg/mL						STDEV	LOG STDEV	MIC			mg/mL						STDEV	LOG STDEV	MIC			mg/mL						STDEV	LOG STDEV	MIC
	2	550	0			275	388.909	2.58985	2.15649e-08	1		2	0	0			0	0	0	0	100		2	500000	32800			266400	330360	5.51899	0.000138293	100
	1	10000000	15000000			12500000	3.53553e+06	6.54846	0.000980222	1		1	12160000000	1256000000	160000000	180000000	3439000000	6.63449e+09	0	0.226335	0.78		1	150000000	150000000			150000000	0	#NUM!	0.0778675	93
	0.5	8400000000	1080000000	696000000	1400000000	2894000000	5.33886e+09	9.72745	0.226941	0.78		0.5	12880000000	1424000000	16000000	1200000000	3880000000	7.05579e+09	9.84855	0.255359	0.75		0.5	320000000	1200000000	168000000	500000000	547000000	3.10557e+09	9.49214	0.283957	72
	0.25	4000000000	116000000	1360000000	12000000000	4369000000	3.68193e+09	9.56608	0.342607	0.66		0.25											0.25	360000000	5600000000	92000000	720000000	1693000000	5.57155e+08	8.74598	0.878864	13
	0.125											0.125											0.125
	Acinetobacter baumannii								375738750000			Escherichia coli								1.66272e+12			Salmonella typhimurium								1355977500000
	mg/mL						STDEV	LOG STDEV	MIC			mg/mL						STDEV	LOG STDEV	MIC			mg/mL						STDEV	LOG STDEV	MIC
	2	0	0			0	0	0	0	1		2	3000	5000			4000	1414.21	3.15051	2.4057e-07	100		2	0	0		0	0	0	#NUM!	0	1
	1	50	0			25	35.3553	1.54846	6.65356e-09	1		1	28000000	7200000	216000000	2240000000	622800000	1.15017e+08	8.06076	0.0374568	97		1	0	0			0	0	#NUM!	0	1
	0.5	28000000	23200000	40000000		30400000	8.65332e+06	6.93718	0.00809073	1		0.5	7200000000	104000000	7200000000	104000000	3652000000	4.09688e+09	9.61245	0.21964	78		0.5	15000000	146000000	860000000		3.40333e+08	4.54786e+08	8.65781	0.0250987	0.98
	0.25	5760000000	696000000	740000000	336000000	1883000000	2.91108e+09	9.46405	0.501146	0.5		0.25											0.25	150000000	246000000	1680000000		692000000	8.56978e+08	8.93297	0.0510333	0.95
	0.125											0.125											0.125	652000000	3760000000	652000000	3760000000	2206000000	5.42112e+09	9.73409	0.162687	0.84
																							0.0625	1000000000	264000000	10000000000	264000000	2882000000	1.7944e+09	9.25392	0.21254	0.79

## Sheet: Water 
Staphylococcus aureus ATCC 29213
Escherichia coli ATCC 25922
Salmonella typhimurium ATCC 14028
Acinetobacter baumannii ATCC 17878
Enterococcus faecalis ATCC 29212
Methicillin-resistant Staphylococcus aureus (MRSA)(WKZ-1)
																	AVARAGE	STDEV	log stdev
	Staphylococcus aureus			1372660000000	2665900000000	8080000000	30800000000	480000000000	1560000000000					519720000000	1372660000000	2665900000000	1.51943e+12
	MRSA			1.17798e+12	2.33787e+12	4360000000	28000000000	240000000000	820000000000	2160000000	44000000000	180000000000	1160000000000	309815000000	1.17798e+12	2.33787e+12	309815000000	1.01752e+12	12.0075
	Enterococcus faecalis			2.22853e+11	2.48567e+11	280000000	10000000000	100000000000	100000000000	400000000	1200000000	40000000000	600000000000	106485000000	2.22853e+11	2.48567e+11	192635000000	7.57077e+10	10.8791
	Acinetobacter baumannii			3.9655e+11	4.62333e+11	1800000000	10400000000	168000000000	1800000000000	1060000000	3400000000	22000000000	140000000000	268332500000	3.9655e+11	4.62333e+11	375738750000	9.86607e+10	10.9941
	Escherichia coli			1325311250000	2599000000000	5760000000	33600000000	456000000000	3760000000000					1063840000000	1325311250000	2599000000000	1.66272e+12	8.21317e+11	11.9145
	Salmonella typhimurium			1142270000000	2106450000000	2400000000	4300000000	36000000000	45000000000	272000000000	194000000000	2300000000000	3700000000000	819212500000	1142270000000	2106450000000	1355977500000	6.697e+11	11.8259
	Water Extract Fraction of C.hyalolepis
	MRSA								1.27522e+12			Staphylococcus aureus								1.51943e+12			Enterococcus faecalis								192635000000
	mg/mL						STDEV	LOG STDEV	MIC			mg/mL						STDEV	LOG STDEV	MIC			mg/mL						STDEV	LOG STDEV	MIC
	2	1500000000	760000000	6240000000		2.83333e+09	2.97337e+09	9.47325	0.222184	0.78		2	1136000000	6560000000	134000000	8600000000	4107500000	3.45729e+09	9.61358	0.270332	0.73		2	1500000000	100000000	176000000		592000000	7.87269e+08	8.89612	0.307317	70
	1											1											1
	0.5											0.5											0.5
	0.25											0.25											0.25
	0.125											0.125											0.125
	Acinetobacter baumannii								375738750000			Escherichia coli								1.66272e+12			Salmonella typhimurium								1355977500000
	mg/mL						STDEV	LOG STDEV	MIC			mg/mL						STDEV	LOG STDEV	MIC			mg/mL						STDEV	LOG STDEV	MIC
	2	1500000000	2280000000	864000000		1548000000	7.09219e+08	0	0.411988	0.59		2	544000000	2800000000	1504000000	5680000000	2632000000	1.13216e+09	9.05391	0.158295	0.85		2	1500000000	400000000	4160000000		2020000000	1.93318e+09	9.28627	0.14897	0.85
	1											1											1
	0.5											0.5											0.5
	0.25											0.25											0.25
	0.125											0.125											0.125
																							0.0625
