# Supplementary material for: Antimicrobial and antibiofilm activity of specialized metabolites isolated from Centaurea hyalolepis
Source: PeerJ. 2024 Mar 26;12:e16973. doi: 10.7717/peerj.16973 (PMC10979744; doi:10.7717/peerj.16973)
Supplement: Supplemental Information 6 [file peerj-12-16973-s006.xlsx]

## Sheet: Sheet1
Staphylococcus aureus ATCC 29213
Escherichia coli ATCC 25922
Salmonella typhimurium ATCC 14028
Acinetobacter baumannii ATCC 17878
Enterococcus faecalis ATCC 29212
Methicillin-resistant Staphylococcus aureus (MRSA)(WKZ-2)
					not Treated														log stdev
	Staphylococcus aureus			1372660000000	2665900000000									#DIV/0!	1372660000000	2665900000000
	MRSA			1.17798e+12	2.33787e+12	4360000000	28000000000	240000000000	820000000000	2160000000	44000000000	180000000000	1160000000000	309815000000	1.17798e+12	2.33787e+12	309815000000	1.01752e+12	12.0075
	Enterococcus faecalis			2.22853e+11	2.48567e+11	280000000	10000000000	100000000000	100000000000	400000000	1200000000	40000000000	600000000000	106485000000	2.22853e+11	2.48567e+11	192635000000	7.57077e+10	10.8791
	Acinetobacter baumannii			3.9655e+11	4.62333e+11	1800000000	10400000000	168000000000	1800000000000	1060000000	3400000000	22000000000	140000000000	268332500000	3.9655e+11	4.62333e+11	375738750000	9.86607e+10	10.9941
	Escherichia coli			1325311250000	2599000000000									#DIV/0!	1325311250000	2599000000000		#DIV/0!	#DIV/0!
	Salmonella typhimurium			1142270000000	2106450000000	2400000000	4300000000	36000000000	45000000000	272000000000	194000000000	2300000000000	3700000000000	819212500000	1142270000000	2106450000000	1355977500000	6.697e+11	11.8259
	CH2CL2 FractionS (E,F,G,H,I,MeOH) of C.hyalolepis
Enterococcus faecalis							192635000000					Salmonella typhimurium								1355977500000
mg/mL	CH.1					STDEV	LOG STDEV	MIC				mg/mL	CH.1					STDEV	LOG STDEV	MIC
2	0	0			0	0	0	0	100			2	0	0			0	0	0	0	1
1	9000	10000			9500	707.107	2.84949	4.93161e-06	100			1	0	0			0	0	#NUM!	0	1
0.5	16000000	15000000	8400000		1.31333e+07	4.12957e+06	6.6159	0.00681773	100			0.5	0	2100			1050	1484.92	3.1717	7.74349e-08	1
0.25	1440000	5000000	6000000		4.14667e+06	2.39678e+06	6.37963	0.0021526	100			0.25	8000	9600			8800	1131.37	3.0536	6.48978e-07	1
0.125	11120000	5800000	1500000		6140000	4.819e+06	6.68296	0.00318738	100			0.125	10580	10700			10640	84.8528	1.92867	7.84674e-07	1
0.0625	60000000	117040000			88520000	4.03334e+07	7.60566	0.0459522	95			0.0625	1640000	1800000	520000000	108000000	157860000	2.4657e+08	8.39194	0.0116418	0.99
												0.0312	16400000	180000000	5200000000	108000000	1376100000	2.55015e+09	9.40656	0.101484	0.9
Enterococcus faecalis							192635000000					Salmonella typhimurium								1355977500000
mg/mL	CH.2					STDEV	LOG STDEV	MIC				mg/mL	CH.2					STDEV	LOG STDEV	MIC
2	500000	4000000			2250000	2.47487e+06	6.39355	0.00116801	100			2	0	0			0	0	0	0	1
1	15000000	4000000			9500000	7.77817e+06	6.89088	0.00493161	100			1	6750	8200			7475	1025.3	3.01085	5.51263e-07	1
0.5	150000000	55200000	5760000		70320000	7.32991e+07	7.8651	0.0365043	97			0.5	148000	1680000000	204000000		6.28049e+08	9.167e+08	8.96223	0.0463171	0.95
0.25	34000000	50000000	7600000	730000000	205400000	3.5017e+08	8.54428	0.106627	90			0.25	70400000	1656000000			863200000	1.12119e+09	9.04968	0.0636589	0.94
0.125												0.125	244000000	2160000000			1202000000	1.35482e+09	9.13188	0.0886445	0.91
												0.0625	4800000000	630000000			2715000000	2.94864e+09	9.46962	0.200225	0.8
Enterococcus faecalis							192635000000					Salmonella typhimurium								1355977500000
mg/mL	CH.3					STDEV	LOG STDEV	MIC				mg/mL	CH.3					STDEV	LOG STDEV	MIC
2	0	0			0	0	#NUM!	0	100			2	0	0			0	0	#NUM!	0	100
1	0	0			0	0	#NUM!	0	100			1	0	0			0	0	#NUM!	0	100
0.5	10600	100000	10300		40300	51701.9	4.71351	2.09204e-05	100			0.5	0	0			0	0	#NUM!	0	100
0.25	400000	380000	12000000	400000	4260000	6.70304e+06	6.82627	0.00221144	100			0.25	0	0			0	0	#NUM!	0	100
0.125	3800000	680000	1400000	2000000	1960000	1.63365e+06	6.21316	0.00101747	100			0.125	5520	10240000			5122760	7.23687e+06	6.85955	0.000377791	100
0.625	1080000000	112300000	160000000	880000000	558075000	5.45454e+08	8.73676	0.289706	72			0.0625	11680000	31400000			21540000	1.39441e+07	7.14439	0.00158852	100
0.312	110000000	1120000000	1300000000	1800000000	1082500000	6.41431e+08	8.80715	0.561944				0.0312	178400000	44000000	10400000		77600000	8.88972e+07	7.94889	0.00572281	100
												0.0156	130000000	1180000000	420000000	3600000000	1332500000	5.42248e+08	8.7342	0.0982686	92
												0.0078	140000000	118000000	5200000000	680000000	1534500000	2.92776e+09	9.46654	0.113166	88
Enterococcus faecalis							192635000000					Salmonella typhimurium								1355977500000
mg/mL	CH.4					STDEV	LOG STDEV	MIC				mg/mL	CH.4					STDEV	LOG STDEV	MIC
2	0	0			0	0	#NUM!	0	100			2	0	0			0	0	0	0	100
1	0	3200			1600	2262.74	3.35463	8.30586e-07	100			1	0	0			0	0	0	0	100
0.5	700	2000			1350	919.239	2.96343	7.00807e-07	100			0.5	0	0			0	0	0	0	100
0.25	600000	1380000	600000	1600000	1045000	521632	5.71736	0.000542477	100			0.25	0	0			0	0	0	0	100
0.125	11600000	3420000	5600000	20000000	10155000	7.4189e+06	6.87034	0.00527163	100			0.125	60000	4000000	1456000		1.83867e+06	1.99768e+06	6.30053	0.000135597	100
0.625	128000000	840000000	116000000	480000000	391000000	3.43665e+08	8.53613	0.202975	80			0.0625	1200000	1980000	74400000	5592000	20793000	3.57892e+07	7.55375	0.00153343	100
0.312												0.0312	140000000	880000000	900000000	172000000	523000000	4.24055e+08	8.62742	0.03857	96
												0.0156	1560000000	1560000000	126000000	118000000	841000000	8.30236e+08	8.9192	0.0620217	94
												0.0078	196000000	990000000			593000000	5.61443e+08	8.74931	0.0437323	92
Enterococcus faecalis							192635000000													1355977500000
mg/mL	CH.5					STDEV	LOG STDEV	MIC				mg/mL	CH.5					STDEV	LOG STDEV	MIC
2	0	0			0	0	0	0	100			2	0	0		0	0	0	0	0	100
1	0	0			0	0	0	0	100			1	0	0			0	0	0	0	100
0.5	0	0			0	0	0	0	100			0.5	0	0			0	0	0	0	100
0.25	160000	200000	940000		433333	439242	5.6427	0.00022495	100			0.25	0	0			0	0	0	0	100
0.125	37600000	8320000			22960000	2.07041e+07	7.31606	0.0119189	99			0.125	2800	0			1400	1979.9	3.29664	1.03247e-07	100
												0.0625	740000	600000			670000	98994.9	4.99561	4.94108e-05	100
												0.0312	27200000	72000000	8160000	10960000	29580000	2.94994e+07	7.46981	0.00218145	100
												0.0156	202000000	600000000	800000000	168000000	442500000	3.08655e+08	8.48947	0.0326333	97
												0.0078	172000000	100000000	168000000	6300000000	1685000000	3.07684e+09	9.48811	0.124265	88
Enterococcus faecalis								192635000000				Salmonella typhimurium								1355977500000
mg/mL	CH.7					STDEV	LOG STDEV	MIC				mg/mL	CH.7					STDEV	LOG STDEV	MIC
2	3700	4800			4250	777.817	2.89088	2.20624e-06	100			2	2	0	0			0	0	0	0	100
1	1500000	200000			850000	919239	5.96343	0.000441249	100			1	1	0	8900			4450	6293.25	3.79888	3.28177e-07	100
0.5	1800000	10400000	280000000	240000	73110000	1.37999e+08	8.13988	0.0379526	97			0.5	0.5	10600	11500	9876	104300	34069	46825.4	4.67048	2.5125e-06	100
0.25	841200000	8400000	9920000	336000000	298880000	3.93008e+08	8.5944	0.155154	85			0.25	0.25	600000000	228000000	2320000000	168000000	829000000	1.0122e+09	9.00527	0.0611367	96
0.125												0.125	0.125	15000000000	1500000000			8250000000	9.54594e+09	0	0.608417	40
												0.0625	0.0625
